# Supplementary material
Source: PubMed Central journal article supplement (PMC7995634)

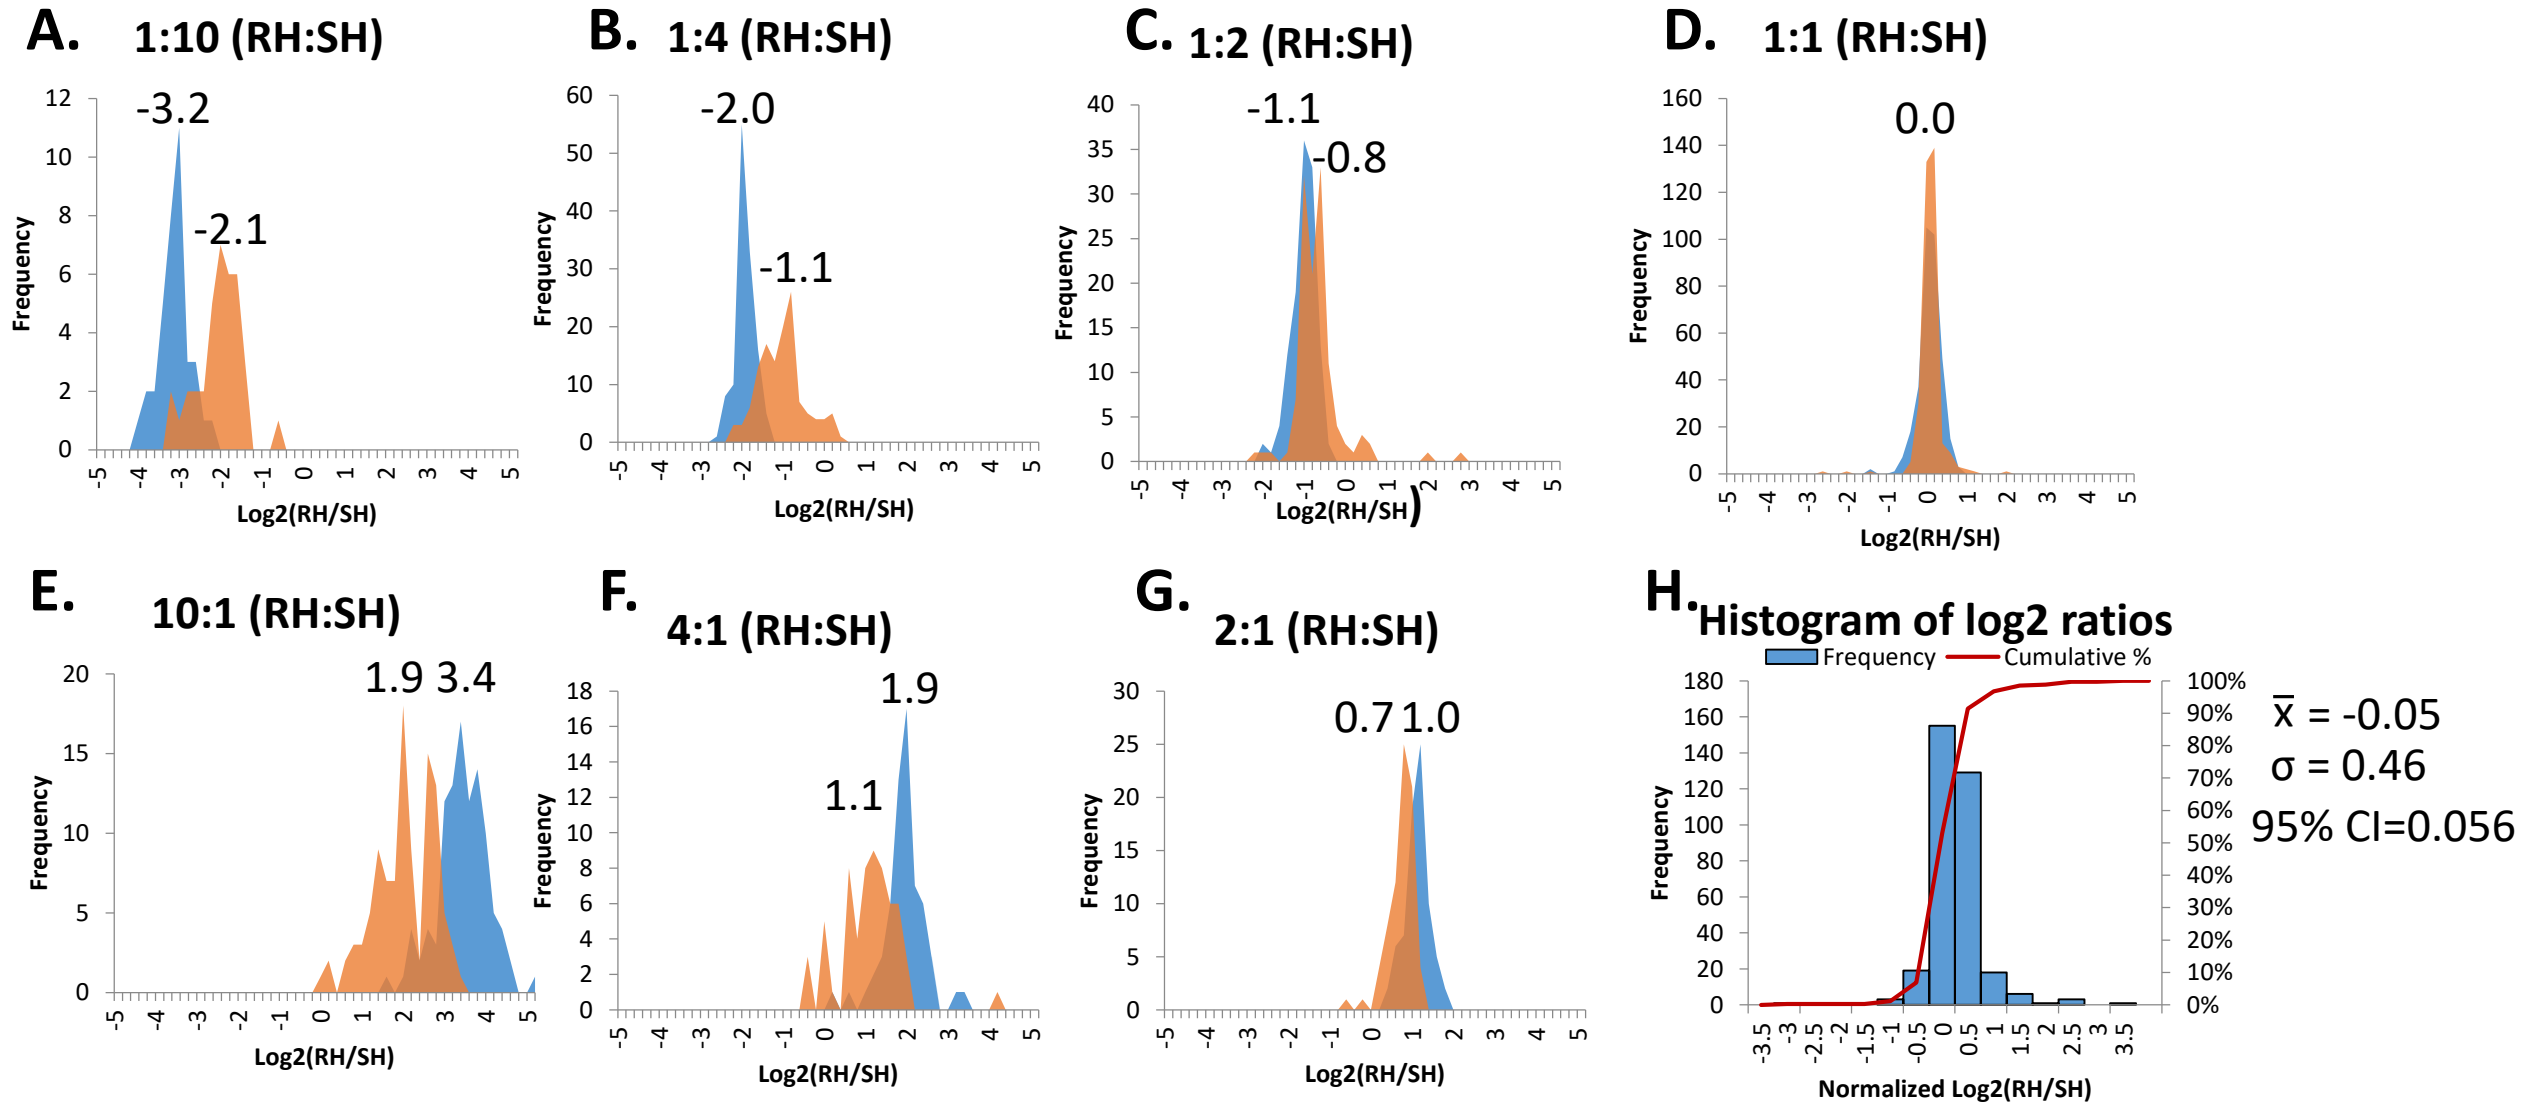

Supplemental Figure 1

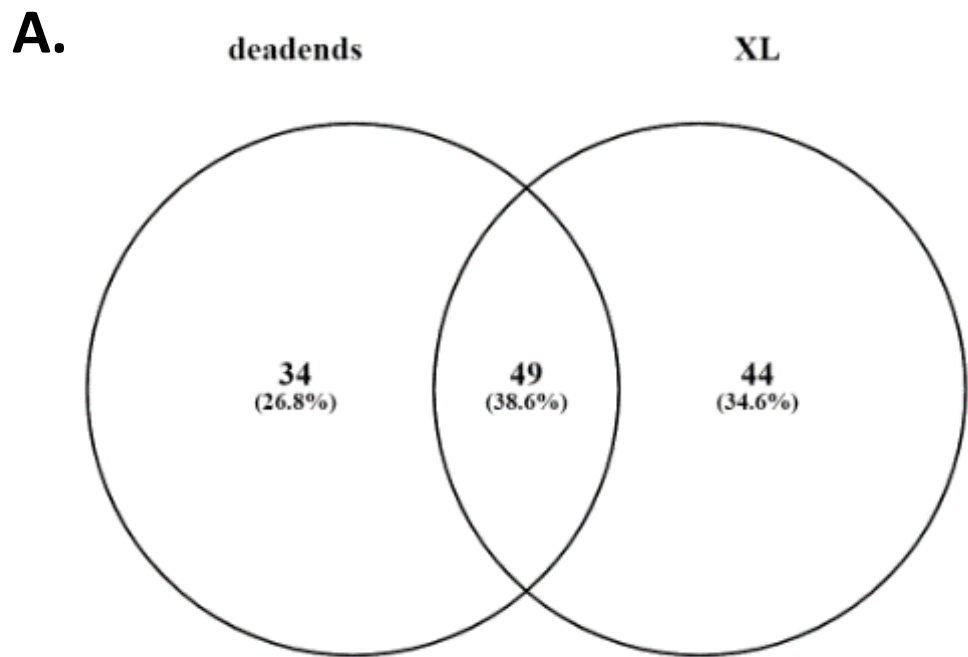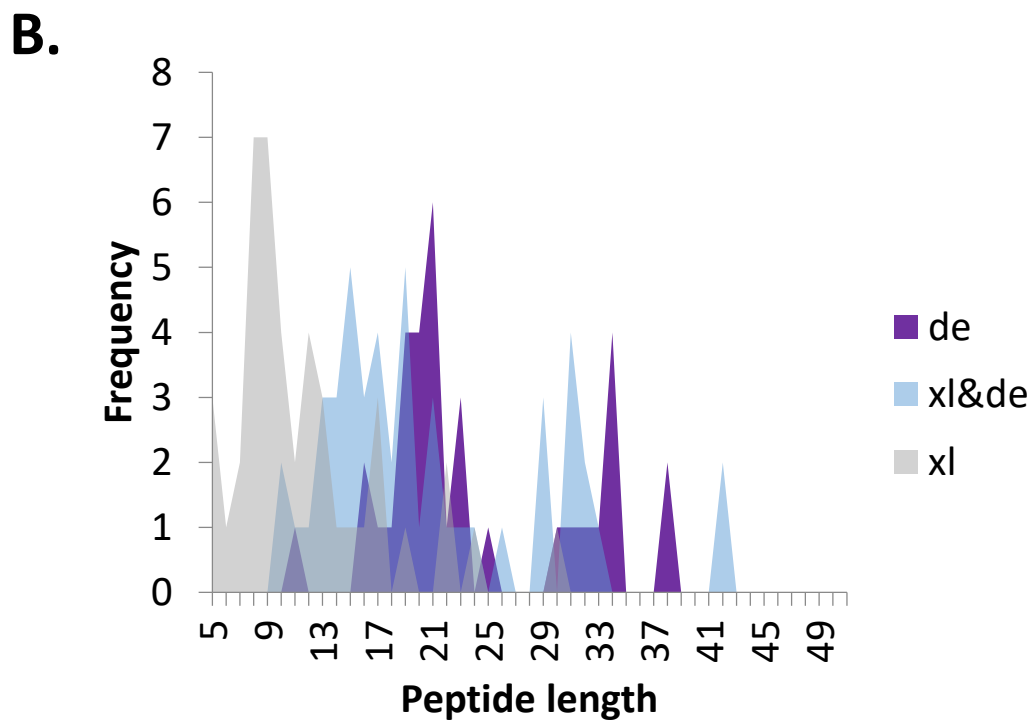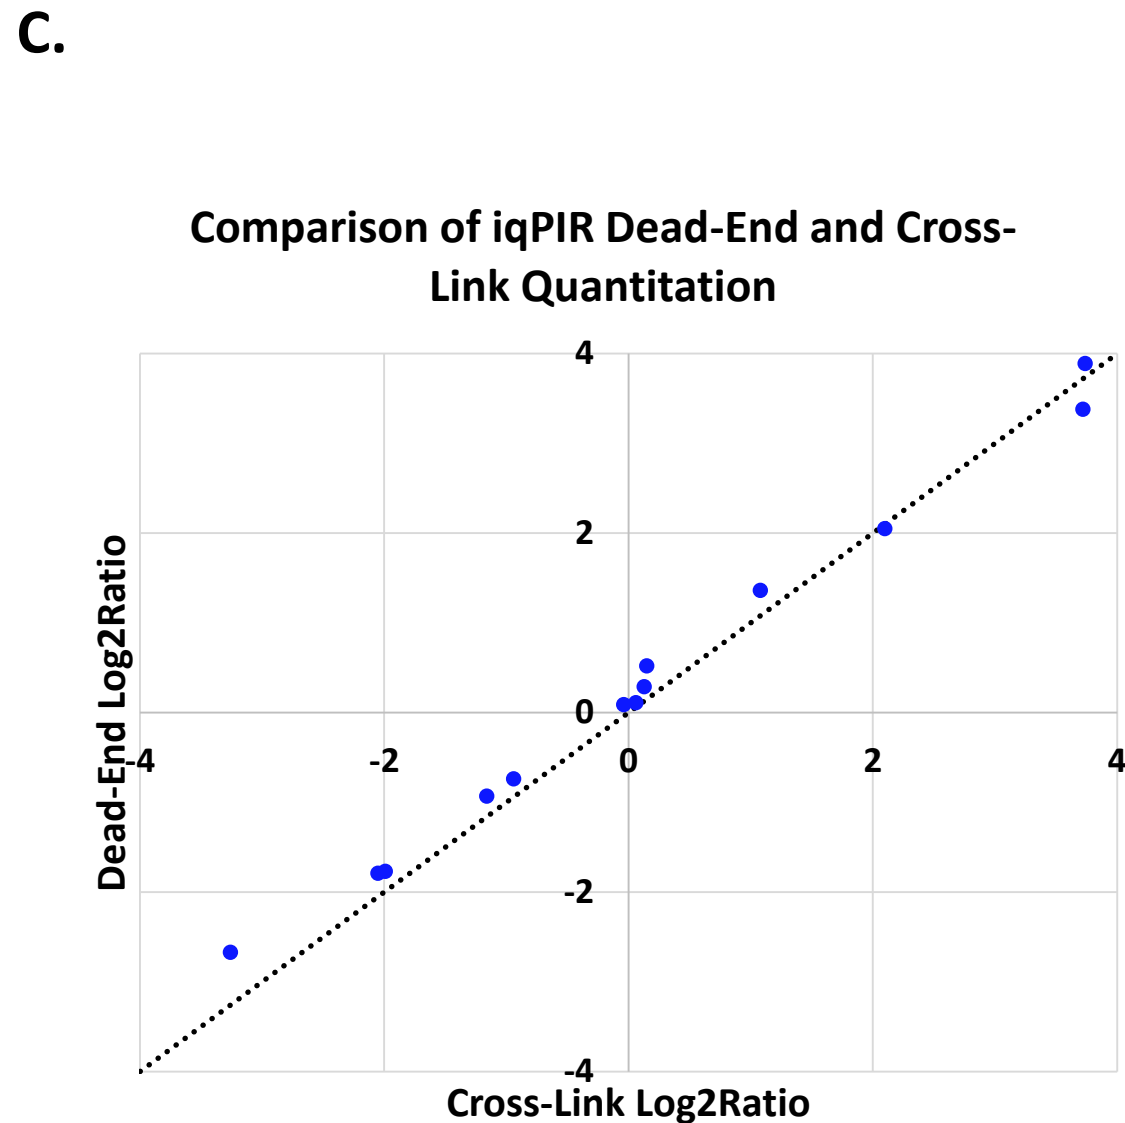

**A**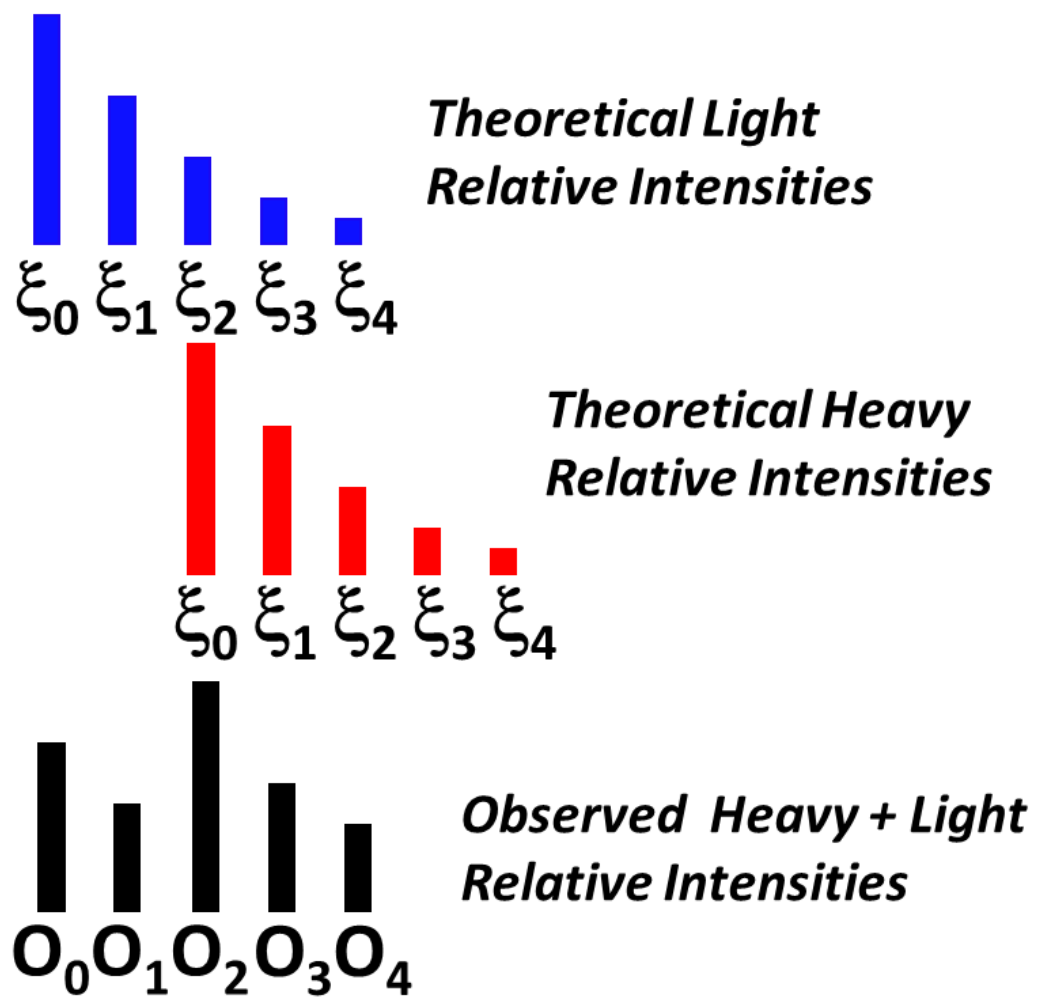**B**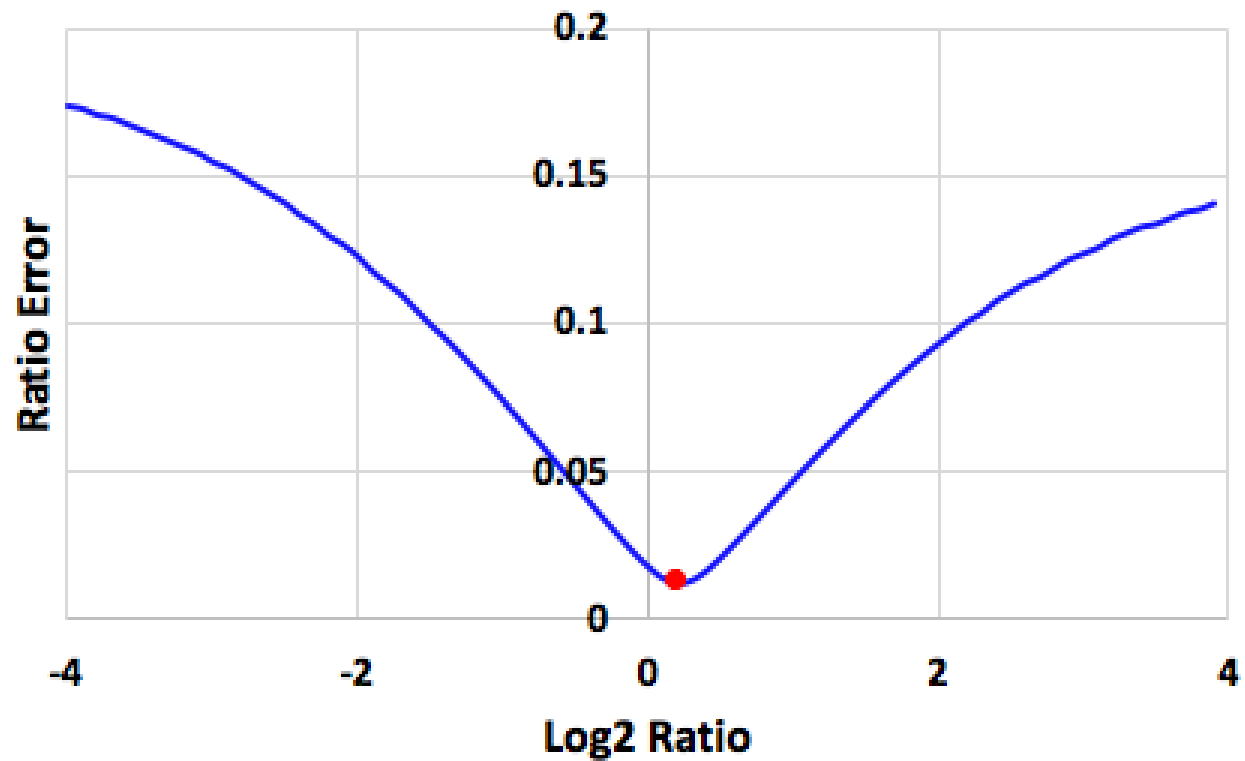

Supplemental Figure 3

Supplement: NIHMS1678920-supplement-Supplemental_figs.pdf [file NIHMS1678920-supplement-Supplemental_figs.pdf]
